# Supplementary material for: A stable cis-stilbene derivative encapsulated in cucurbit[7]urilElectronic Supplementary Information (ESI) available: determination of binding constants. See http://www.rsc.org/suppdata/cc/b3/b306832c/
Source: Royal Society of Chemistry journal article supplement (doi:10.1039/b306832c), 2003-01-01
Supplement: b306832c.pdf [file b306832c.pdf]

## Electronic Supplementary Information

### A stable *cis*-stilbene derivative encapsulated in cucurbit[7]uril

Soowhan Choi, Sang Hyun Park, Albina Y. Ziganshina, Young Ho Ko, Jae Wook Lee, and Kimoon Kim\*

National Creative Research Initiative Center for Smart Supramolecules and Department of Chemistry, Division of Molecular and Life Sciences, Pohang University of Science and Technology (POSTECH), San 31 Hyojadong, Pohang 790-784, Republic of Korea. Fax: (+82)54-279-8129; E-mail: [kkim@postech.ac.kr](mailto:kkim@postech.ac.kr)

#### Determination of binding constants

The binding constants were determined by UV titration on a Hewlett-Packard 8453 diode array spectrophotometer. The experiments were carried out in 2 M citric acid / sodium hydroxide buffer solution (pH 3). The guest (*trans*-**1**, *cis*-**1**) concentration ( $[1^0]$ ) was held constant ( $6 \times 10^{-5}$  M) and the CB[7] concentration ( $[CB[7]^0]$ ) was varied ( $0 - 2.4 \times 10^{-4}$  M). The concentration of *trans*-**1** was calculated by using molar absorption coefficient at 296 nm ( $\epsilon_{trans-1} = 25800 \text{ M}^{-1}\text{cm}^{-1}$ ).<sup>1</sup> From this data, the molar absorption coefficients of *cis*-**1**, *trans*-**1**⊂CB[7] and *cis*-**1**⊂CB[7] were estimated to be  $9100 \text{ M}^{-1}\text{cm}^{-1}$ ,  $20800 \text{ M}^{-1}\text{cm}^{-1}$ ,  $7900 \text{ M}^{-1}\text{cm}^{-1}$  respectively. Fig. S1 shows the gradual change in UV-vis absorption spectra of *trans*-**1** and *cis*-**1** with the addition of 0-4 equivalents of CB[7]. The effect of molar ratio  $[1^0] / [CB[7]^0]$  change on the absorbance of **1** at 296 nm is shown on Fig. S2.

The stability constants were calculated by using modified Rose-Drago equation.<sup>2</sup> The Rose-Drago expression for the stability constant  $K = [1\subset CB[7]] / [1] \times [CB[7]]$ , for the reaction  $1 + CB[7] = 1\subset CB[7]$ , where  $[1]$ ,  $[CB[7]]$  and  $[1\subset CB[7]]$  represent equilibrium concentration of **1**, CB[7] and **1**⊂CB[7], respectively, is:

$$([1^0] + [CB[7]^0]) / \Delta\epsilon_{1\subset CB[7]} + 1 / (K \times \Delta\epsilon_{1\subset CB[7]}) = ([1^0] \times [CB[7]^0] / \Delta A) + \Delta A / \Delta\epsilon_{1\subset CB[7]}^2 \quad (1)$$

in which,  $\Delta\epsilon_{1\subset CB[7]} = \epsilon_1 - \epsilon_{1\subset CB[7]}$ , where  $\epsilon_1$ ,  $\epsilon_{1\subset CB[7]}$  represent the molar absorption coefficients of **1** and **1**⊂CB[7], respectively;  $\Delta A = A - A_0$ ,  $A_0$  is the initial solution absorbance at 296 nm in absence of CB[7] and  $A$  is the observed solution absorbance in the presence of CB[7].

According to Equation (1) a plot of  $([1^0] \times [CB[7]^0] / \Delta A) + \Delta A / \Delta\epsilon_{1\subset CB[7]}^2$  versus  $[1^0] + [CB[7]^0]$  gives a straight line with an intercept of  $1 / (K \times \Delta\epsilon_{1\subset CB[7]})$ , from which the constants were calculated (Fig. S3).

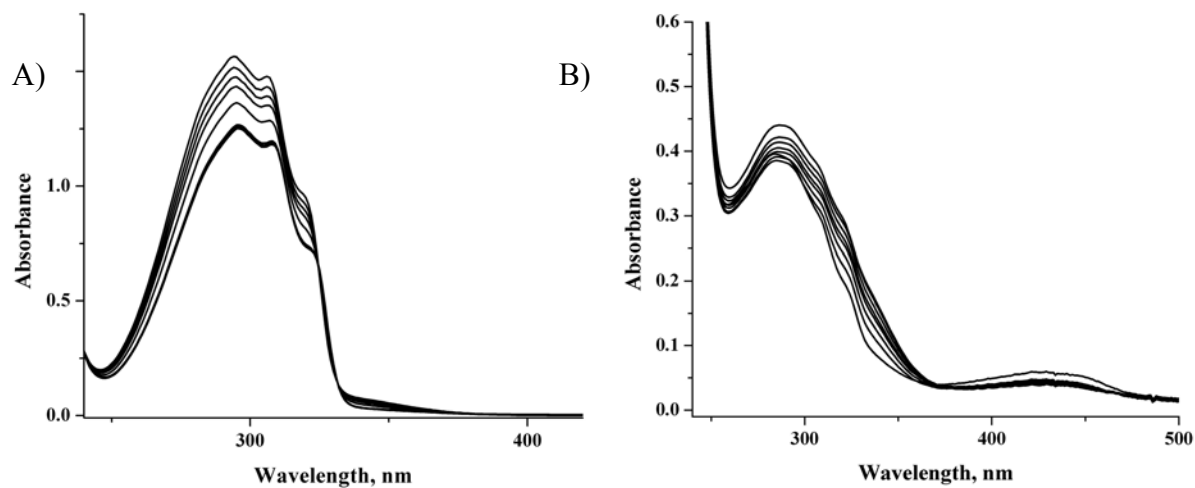

**Fig. S1** UV spectral change during addition of CB[7] to (A) *trans-1* solution, and (B) *cis-1* solution.

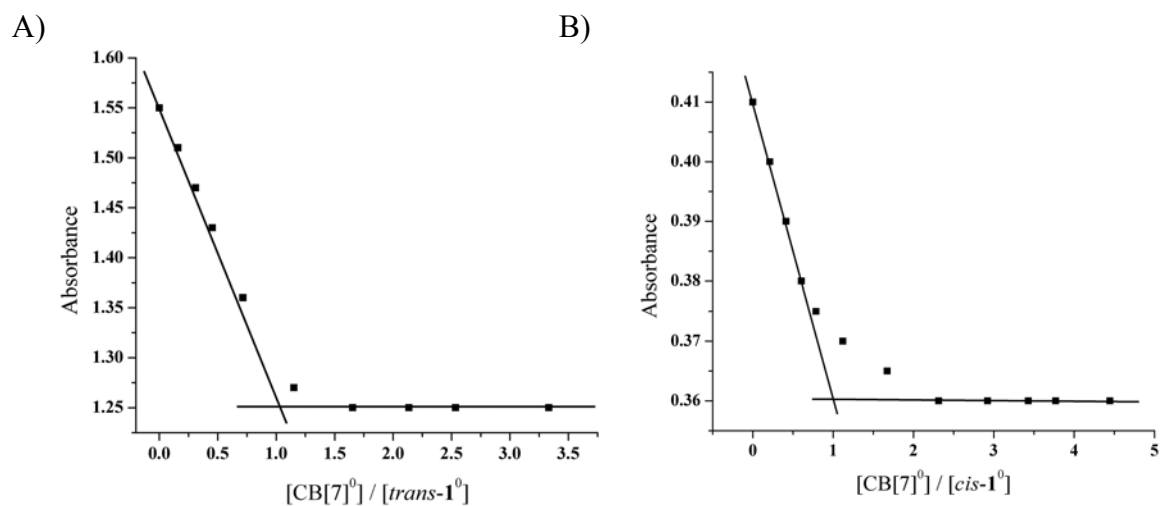

**Fig. S2** The effect of molar ratio  $[CB[7]^0] / [1^0]$  change on the absorbance of (A) *trans-1*, and (B) *cis-1*, at  $\lambda_{\max}$  296 nm. The plots also show that the complexes are formed in a 1:1 molar ratio.

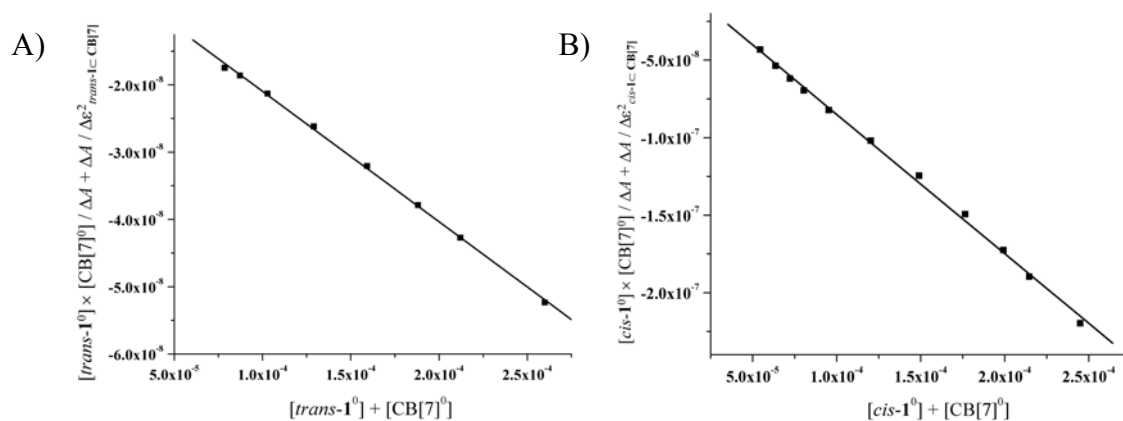

**Fig. S3** Plots of Equation (1) for 1:1 complexation of CB[7] with (A) *trans*-1, and (B) *cis*-1.

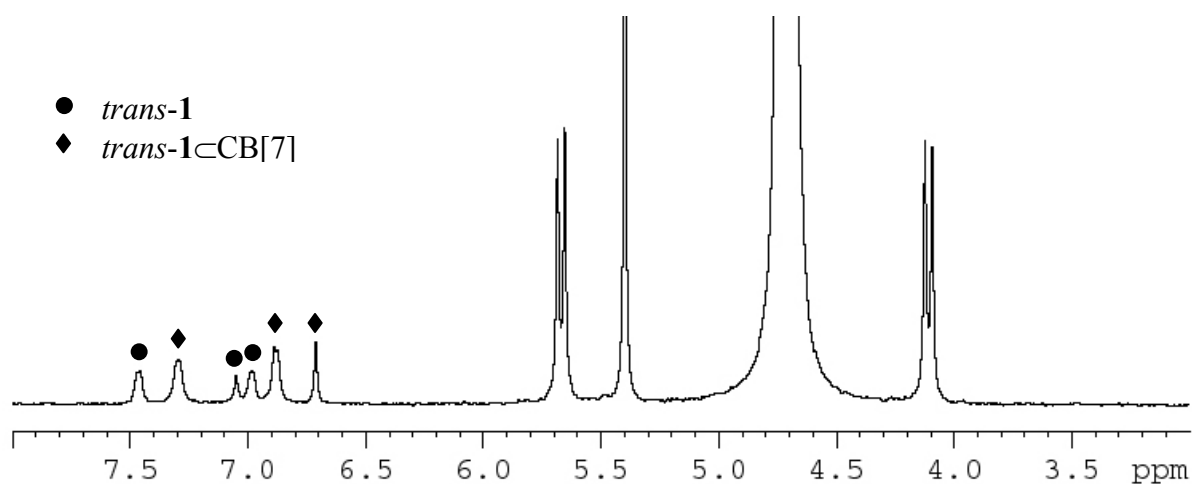

**Fig. S4** <sup>1</sup>H NMR spectrum of *trans*-1 in the presence of 0.6 equivalent CB[7] showing two sets of signals, one for free *trans*-1 and the other for *trans*-1⊂CB[7].

## References

- 1 Y. Zhao, V. Khodorkovsky, J. Cohen and Z. Priel, *J. Photochem. Photobiol., A*, 1996, **99**, 23.
- 2 M. Nishida, D. Ishii, I. Yoshida and S. Shinkai, *Bull. Chem. Soc. Jpn.*, 1997, **70**, 2131.
